# Supplementary material
Source: Research Square preprint supplement (doi:10.21203/rs.3.rs-8622078/v1)

**Predicted cell-cell interaction activity: all leukocytes**

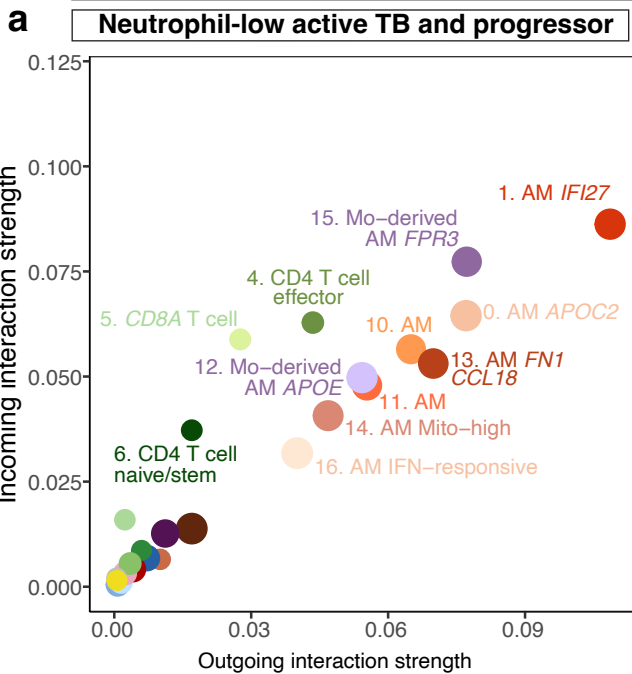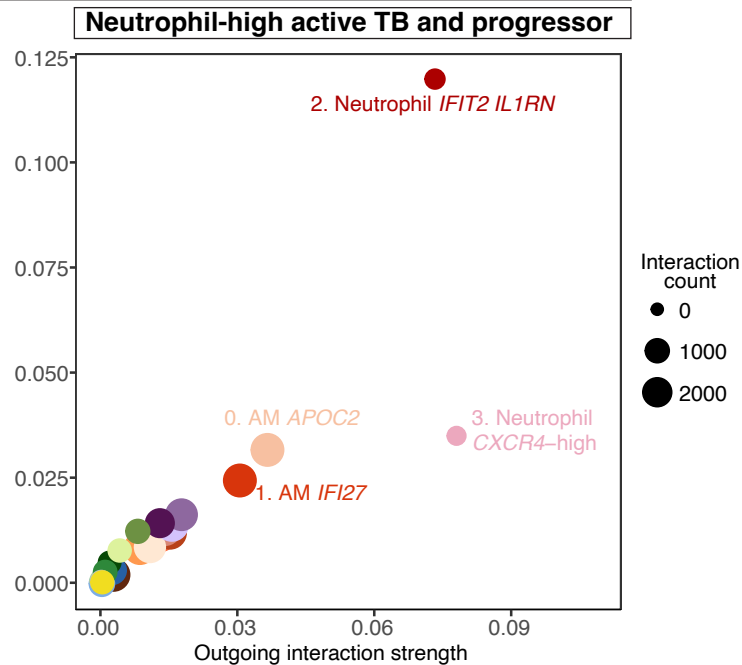

**b** **Neutrophil-low active TB and progressor**

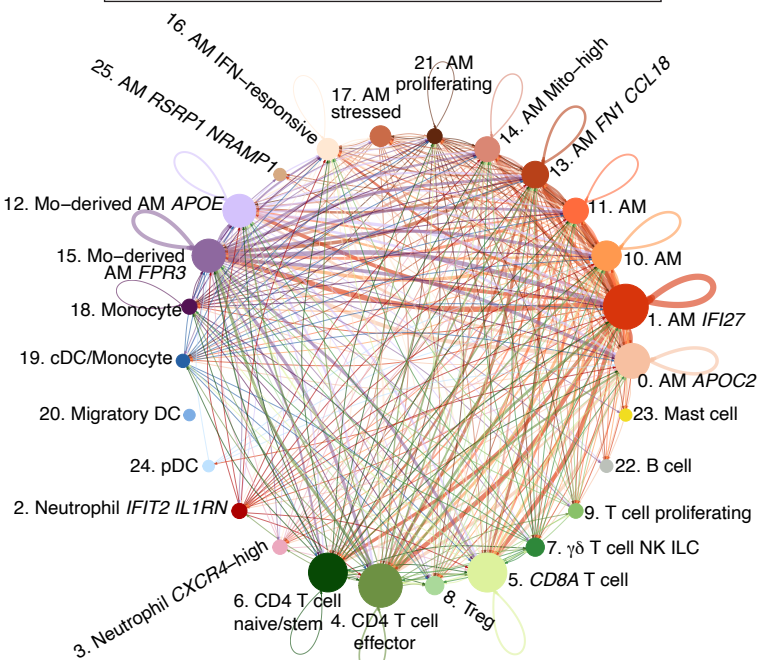

**Neutrophil-high active TB and progressor**

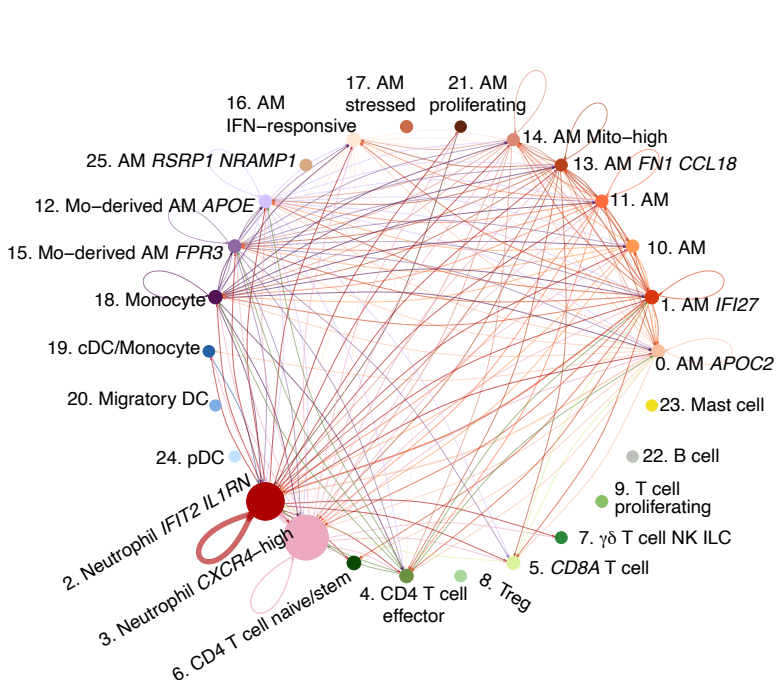

**Predicted cell-cell interaction activity: leukocytes without neutrophils**

**c** **Neutrophil-low active TB and progressor**

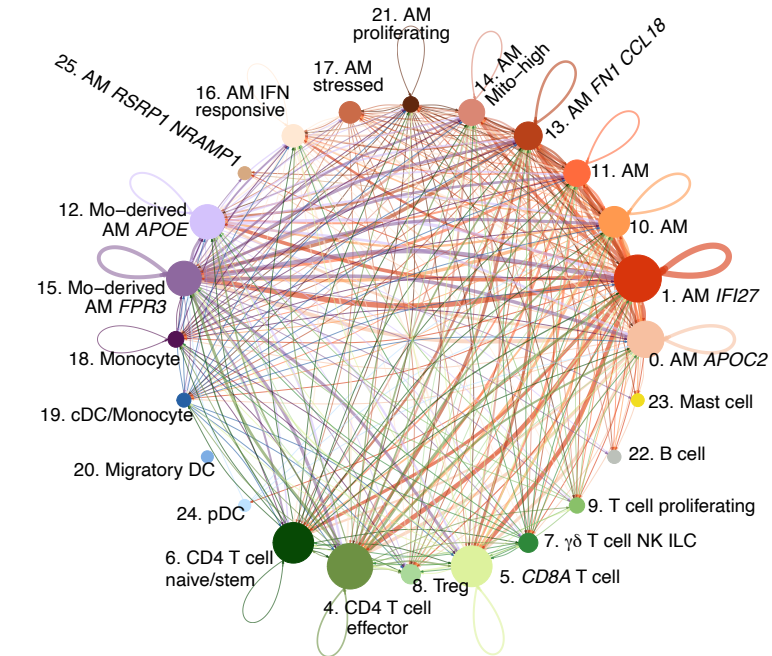

**Neutrophil-high active TB and progressor**

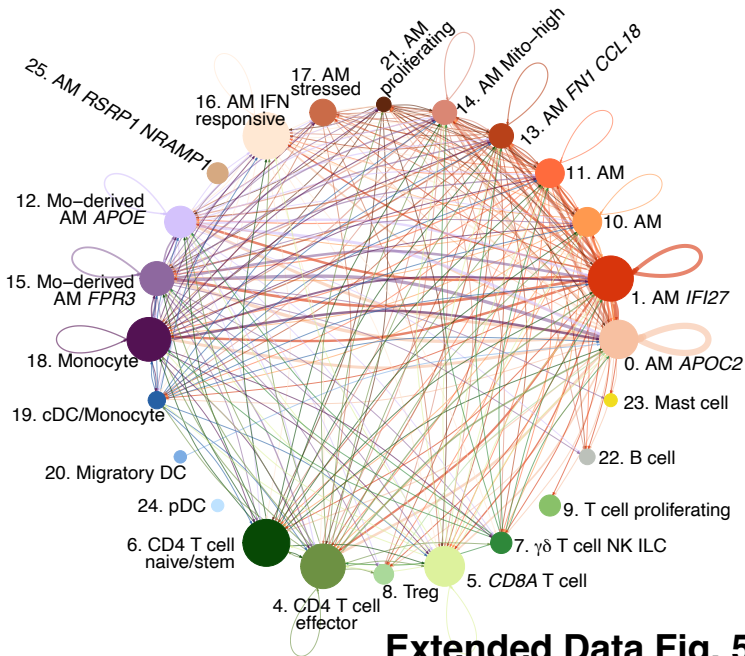

Supplement: Supplementary file 1 [file 5cdfbd744d4fdc7316d9a8a2.pdf]
