# Supplementary material
Source: Research Square preprint supplement (doi:10.21203/rs.3.rs-8622078/v1)
Supplement: Supplementary file 3 [file dc283ea2c60f20a25ba341f6.pdf]

**a** Highly variable genes: whole BAL bulk RNA-seq

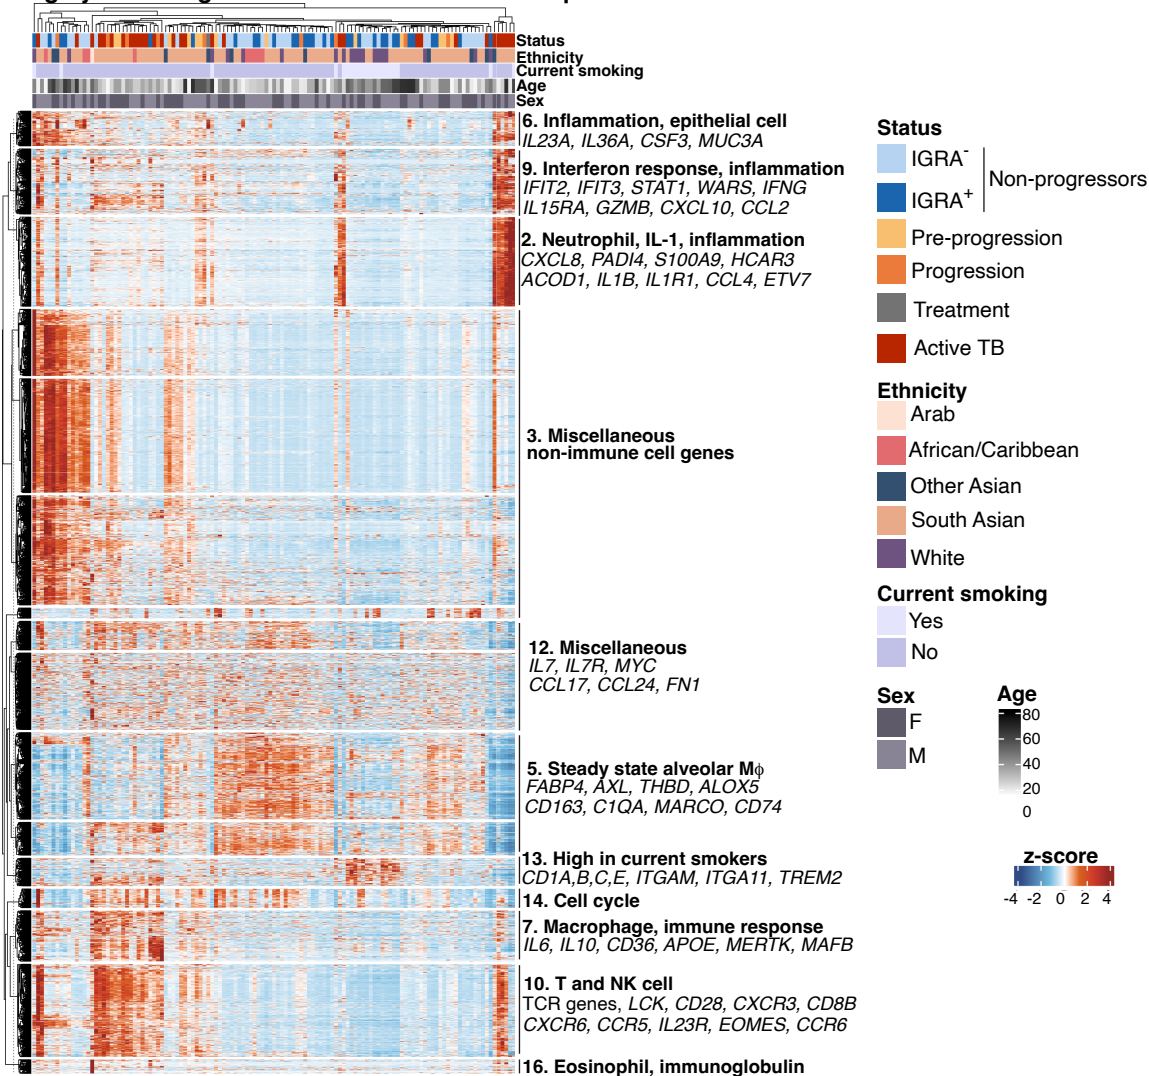

**b** Differentially expressed genes: whole BAL bulk RNA-seq

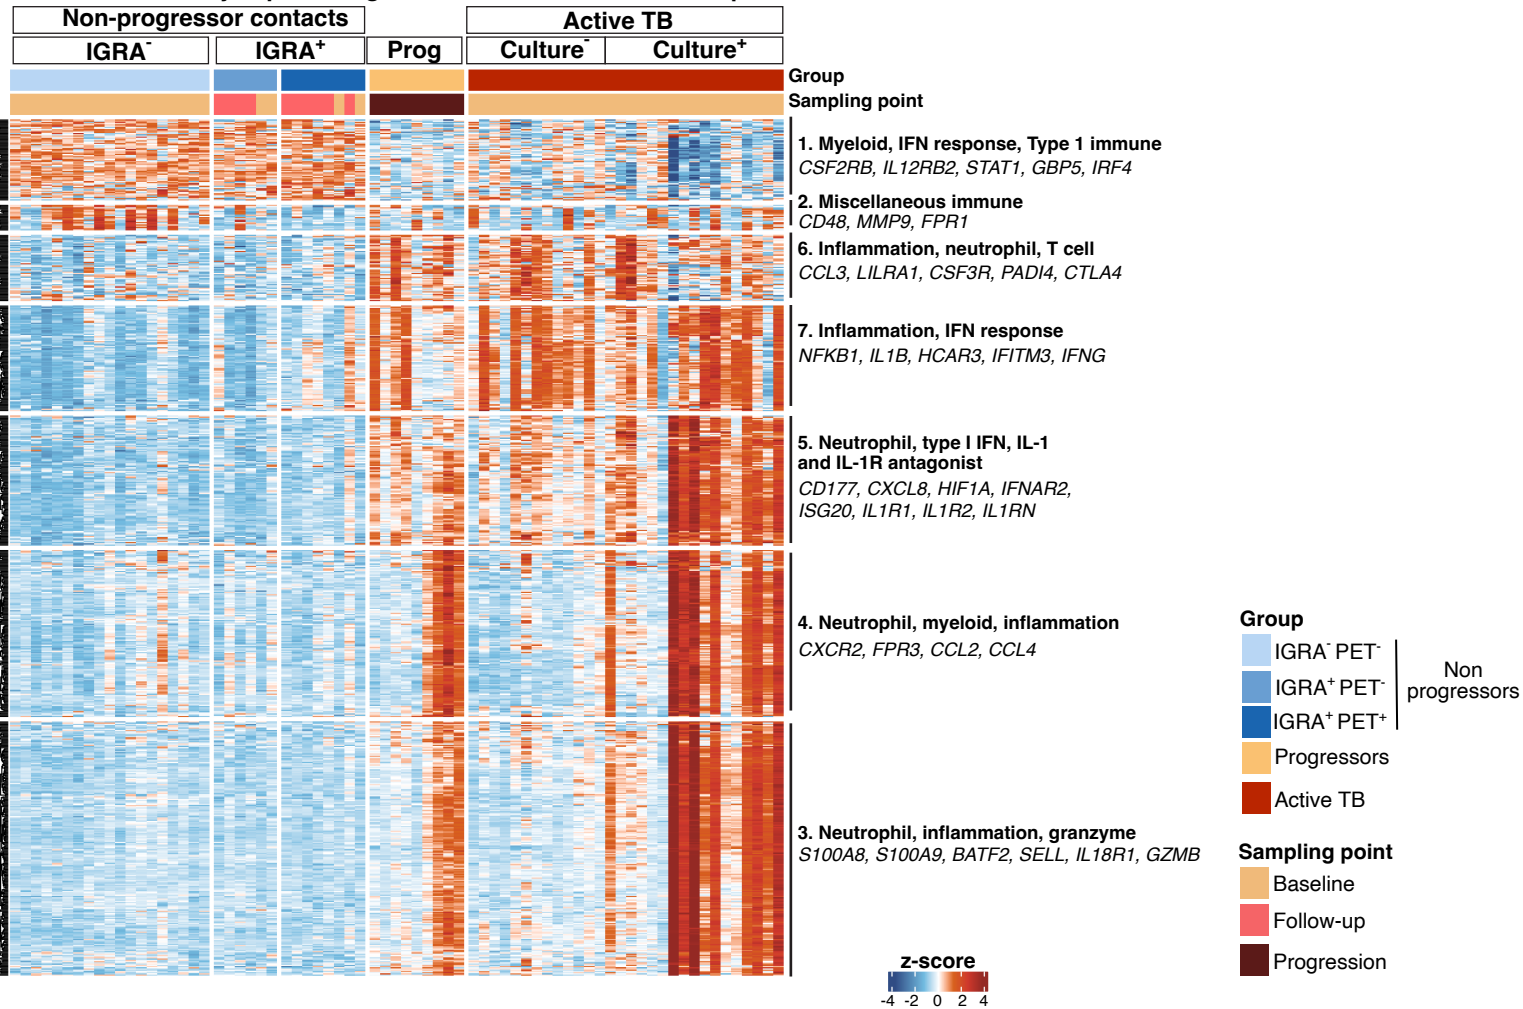

**Extended Data Fig. 2**
