# Supplementary material
Source: Research Square preprint supplement (doi:10.21203/rs.3.rs-8622078/v1)

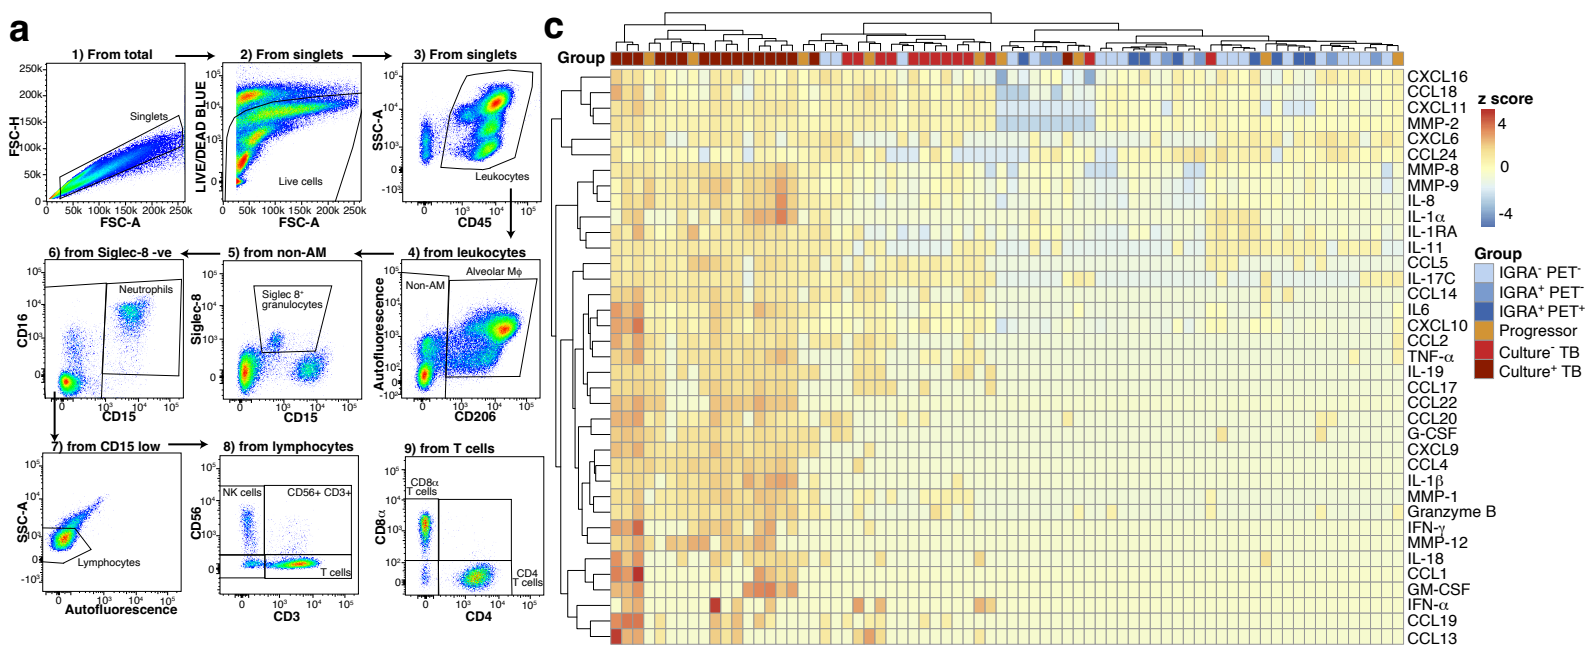

Extended Data Fig. 3

Supplement: Supplementary file 2 [file 7a28393c9a020d4b14c635d8.pdf]
